# Supplementary material for: Suaveolic Acid: A Potent Phytotoxic Substance ofHyptis suaveolens
Source: Hindawi journal article supplement (doi:10.1155/2014/425942), 2014-01-01
Supplement: f1 [file 425942.f1.pdf]

## List of Contents

**Figure S1.**  $^1\text{H}$  NMR spectrum of suaveolic acid (400 MHz,  $\text{CD}_3\text{OD}$ )

**Figure S2.**  $^1\text{H}$  NMR spectrum of suaveolic acid (400 MHz,  $\text{CDCl}_3$ )

**Figure S3.**  $^{13}\text{C}$  NMR spectrum of suaveolic acid (100 MHz,  $\text{CD}_3\text{OD}$ )

**Figure S4.** COSY spectrum of suaveolic acid (400 MHz,  $\text{CD}_3\text{OD}$ )

**Figure S5.** HMQC spectrum of suaveolic acid (400 MHz,  $\text{CD}_3\text{OD}$ )

**Figure S6.** HMBC spectrum of suaveolic acid (400 MHz,  $\text{CD}_3\text{OD}$ )

**Figure S7.** CD spectrum of suaveolic acid (MeOH)

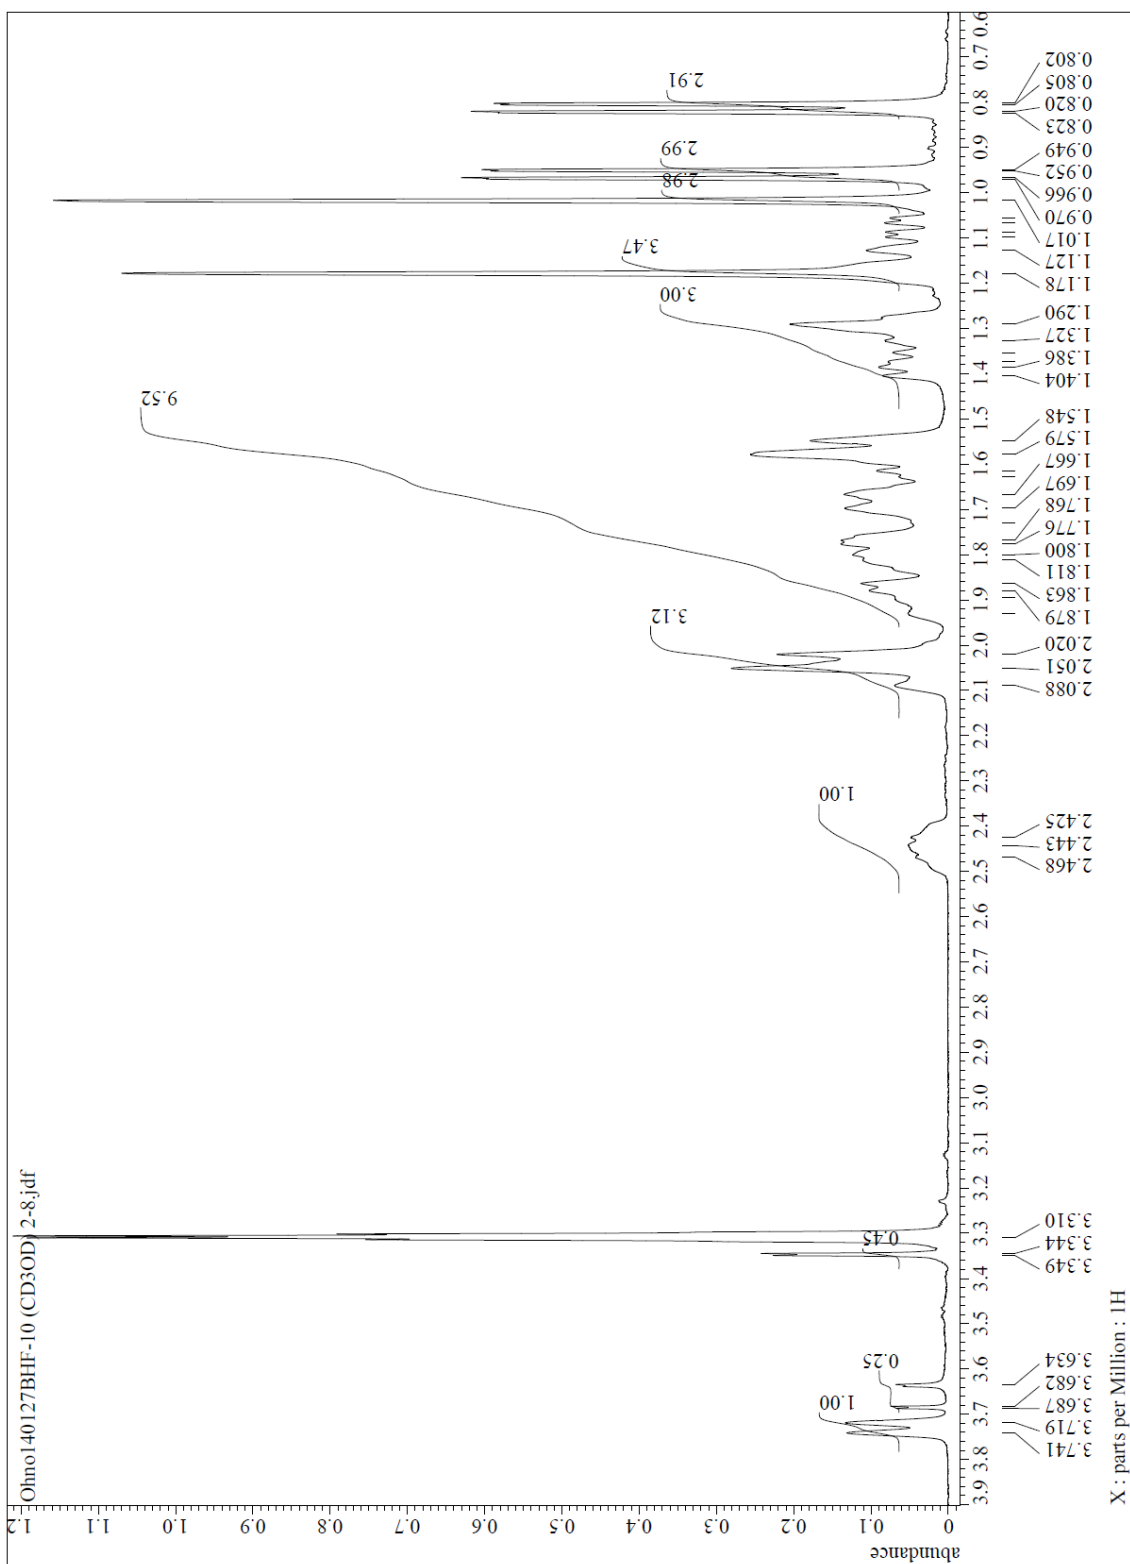

**Figure S1.**  $^1\text{H}$  NMR spectrum of suaveolic acid (400 MHz,  $\text{CD}_3\text{OD}$ )

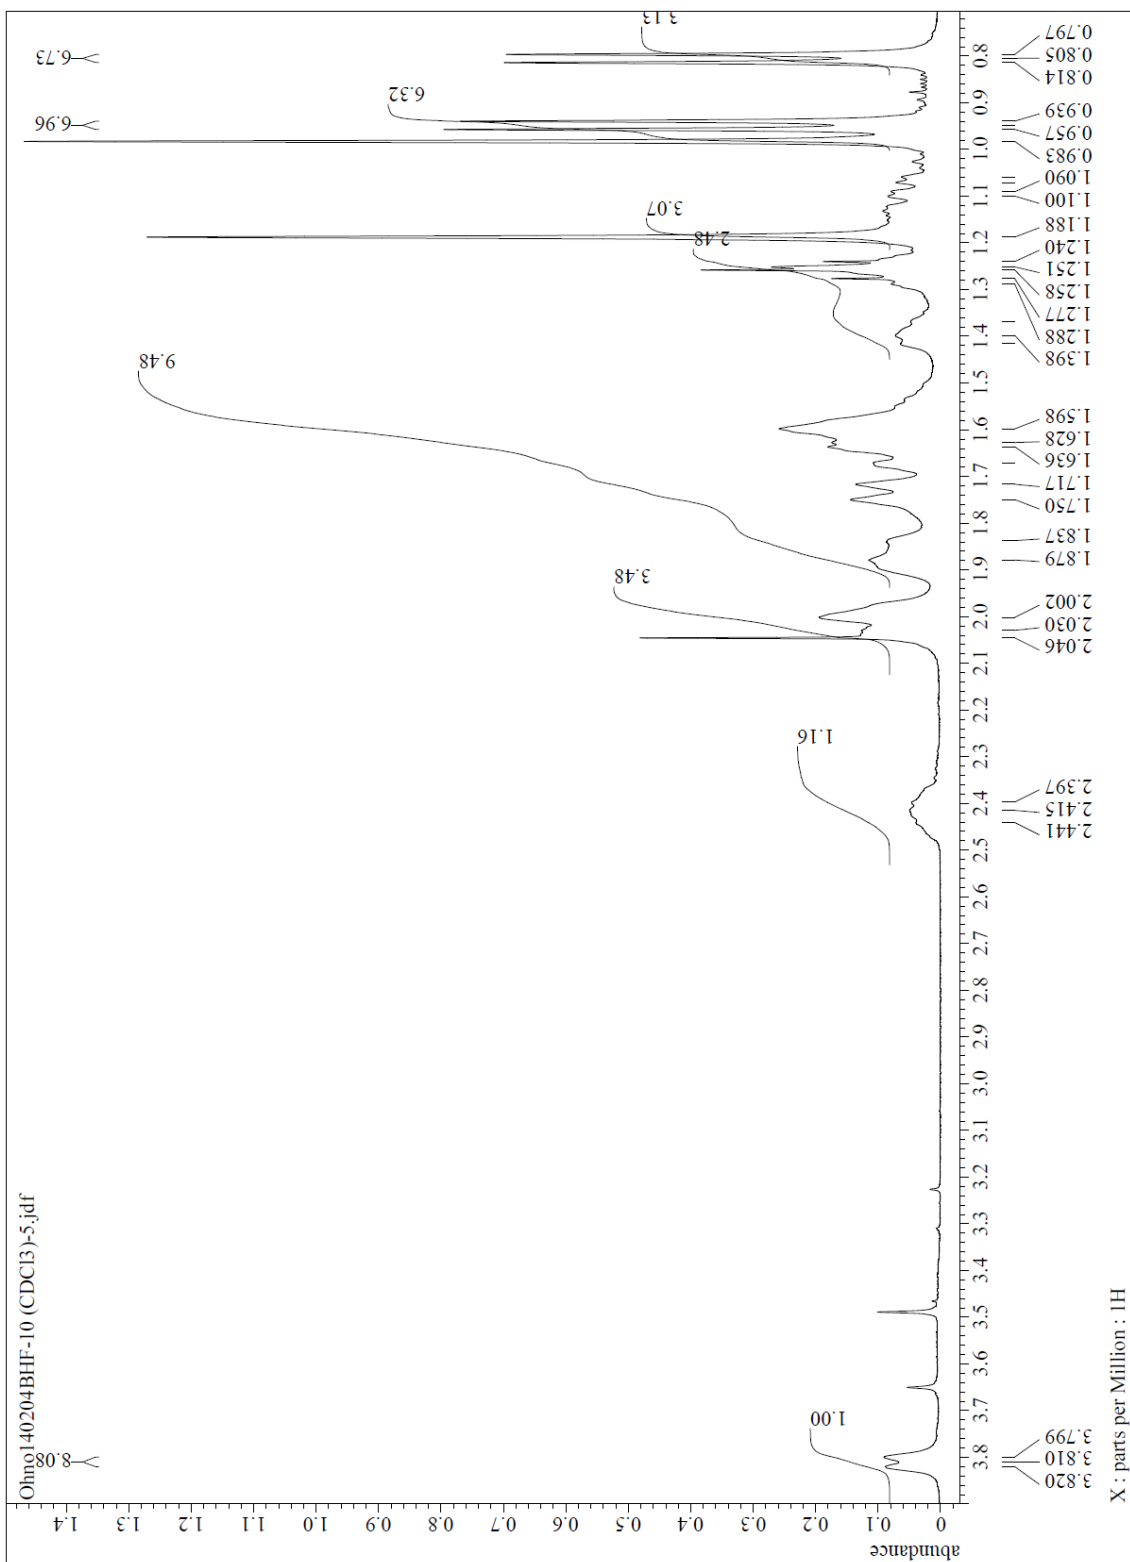

**Figure S2.**  $^1\text{H}$  NMR spectrum of suaveolic acid (400 MHz,  $\text{CDCl}_3$ )

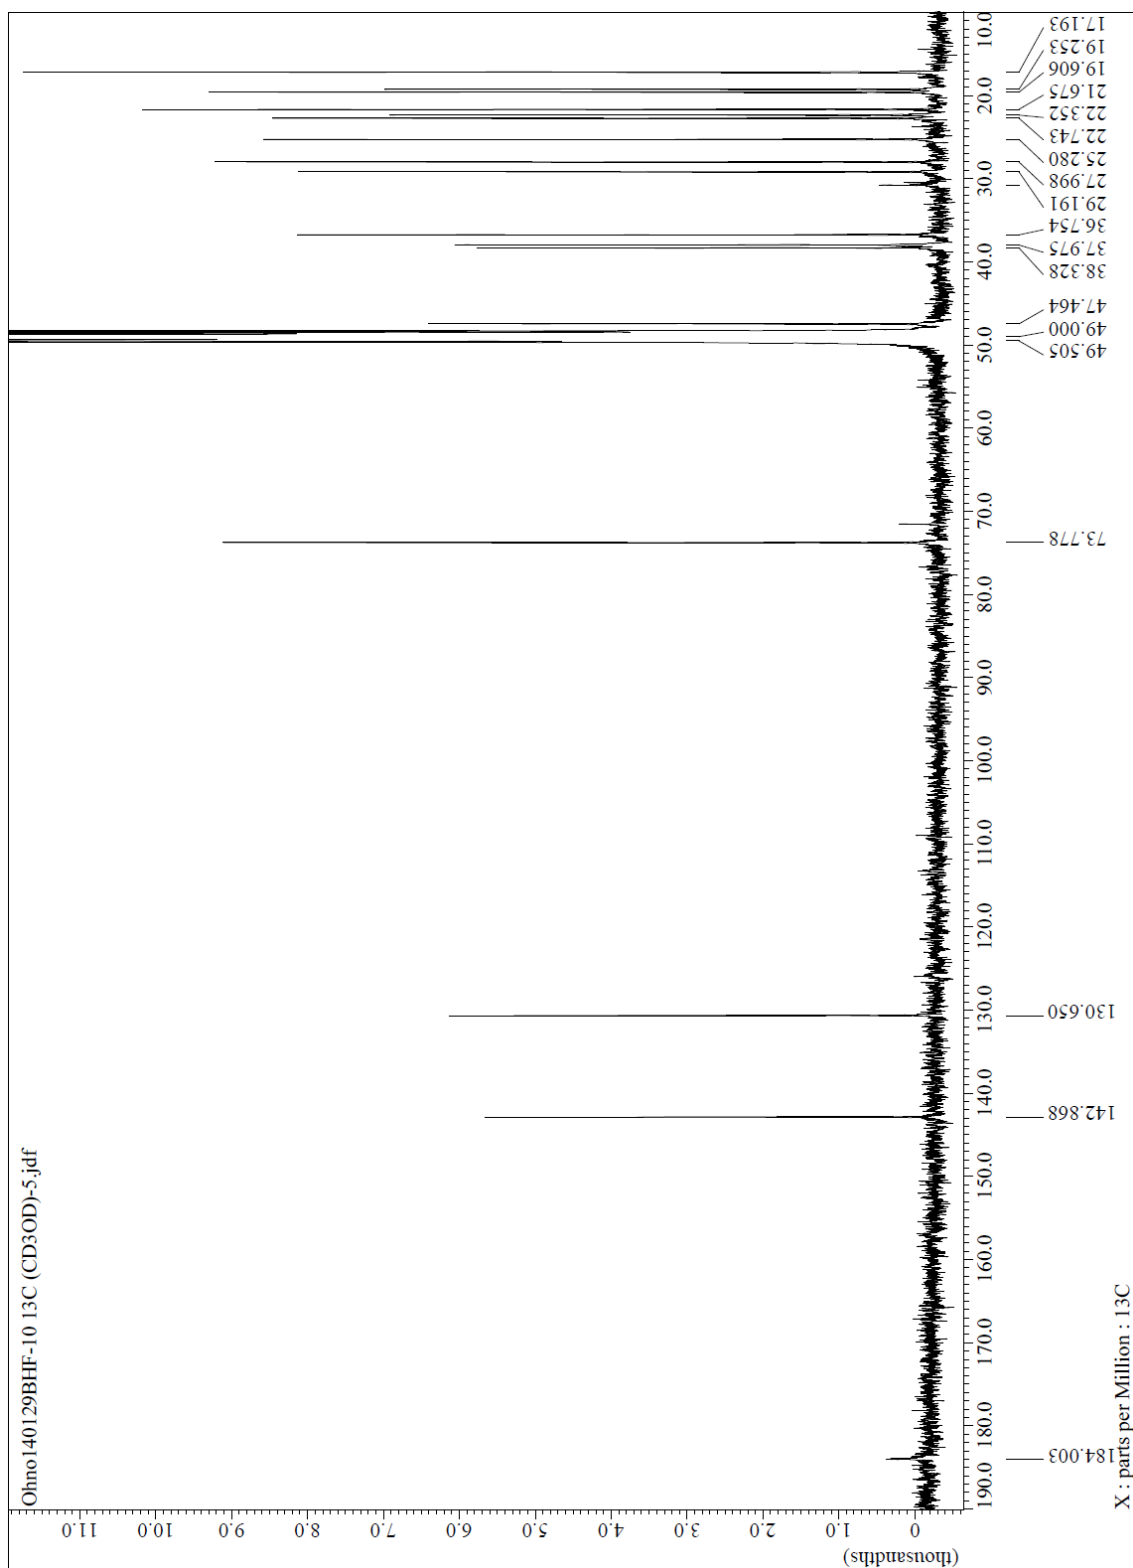

**Figure S3.**  $^{13}\text{C}$  NMR spectrum of suaveolic acid (100 MHz,  $\text{CD}_3\text{OD}$ )

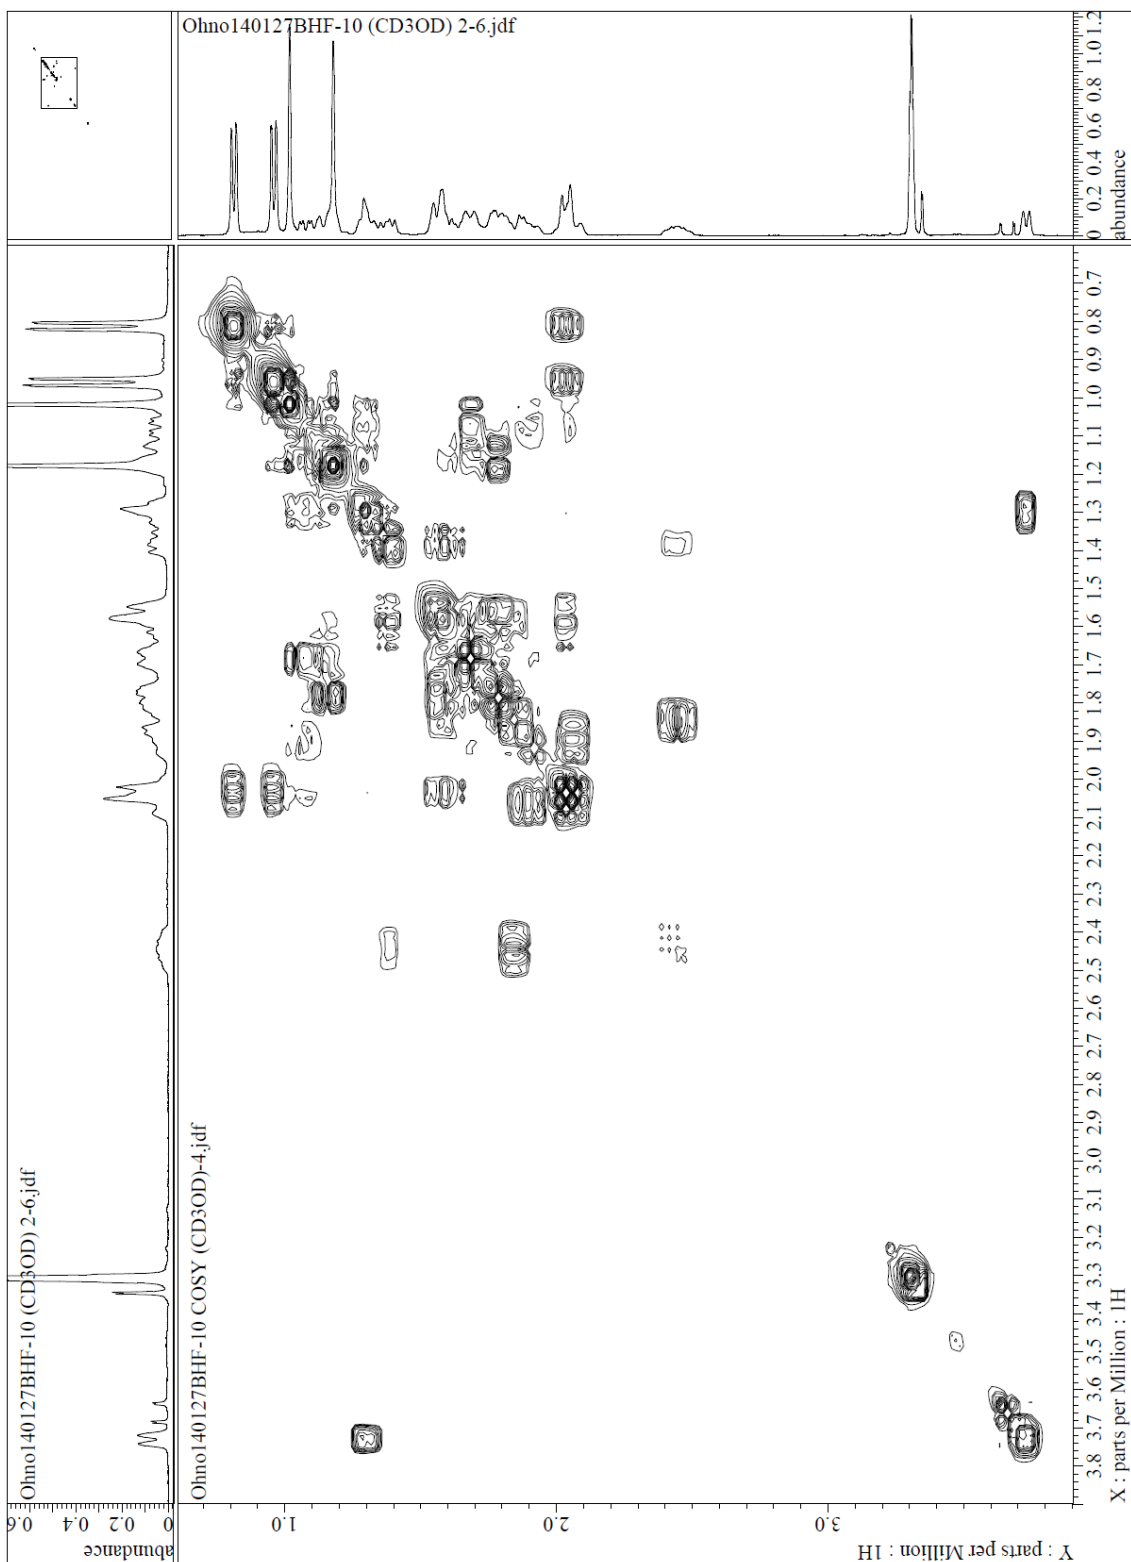

**Figure S4.** COSY spectrum of suaveolic acid (400 MHz, CD<sub>3</sub>OD)

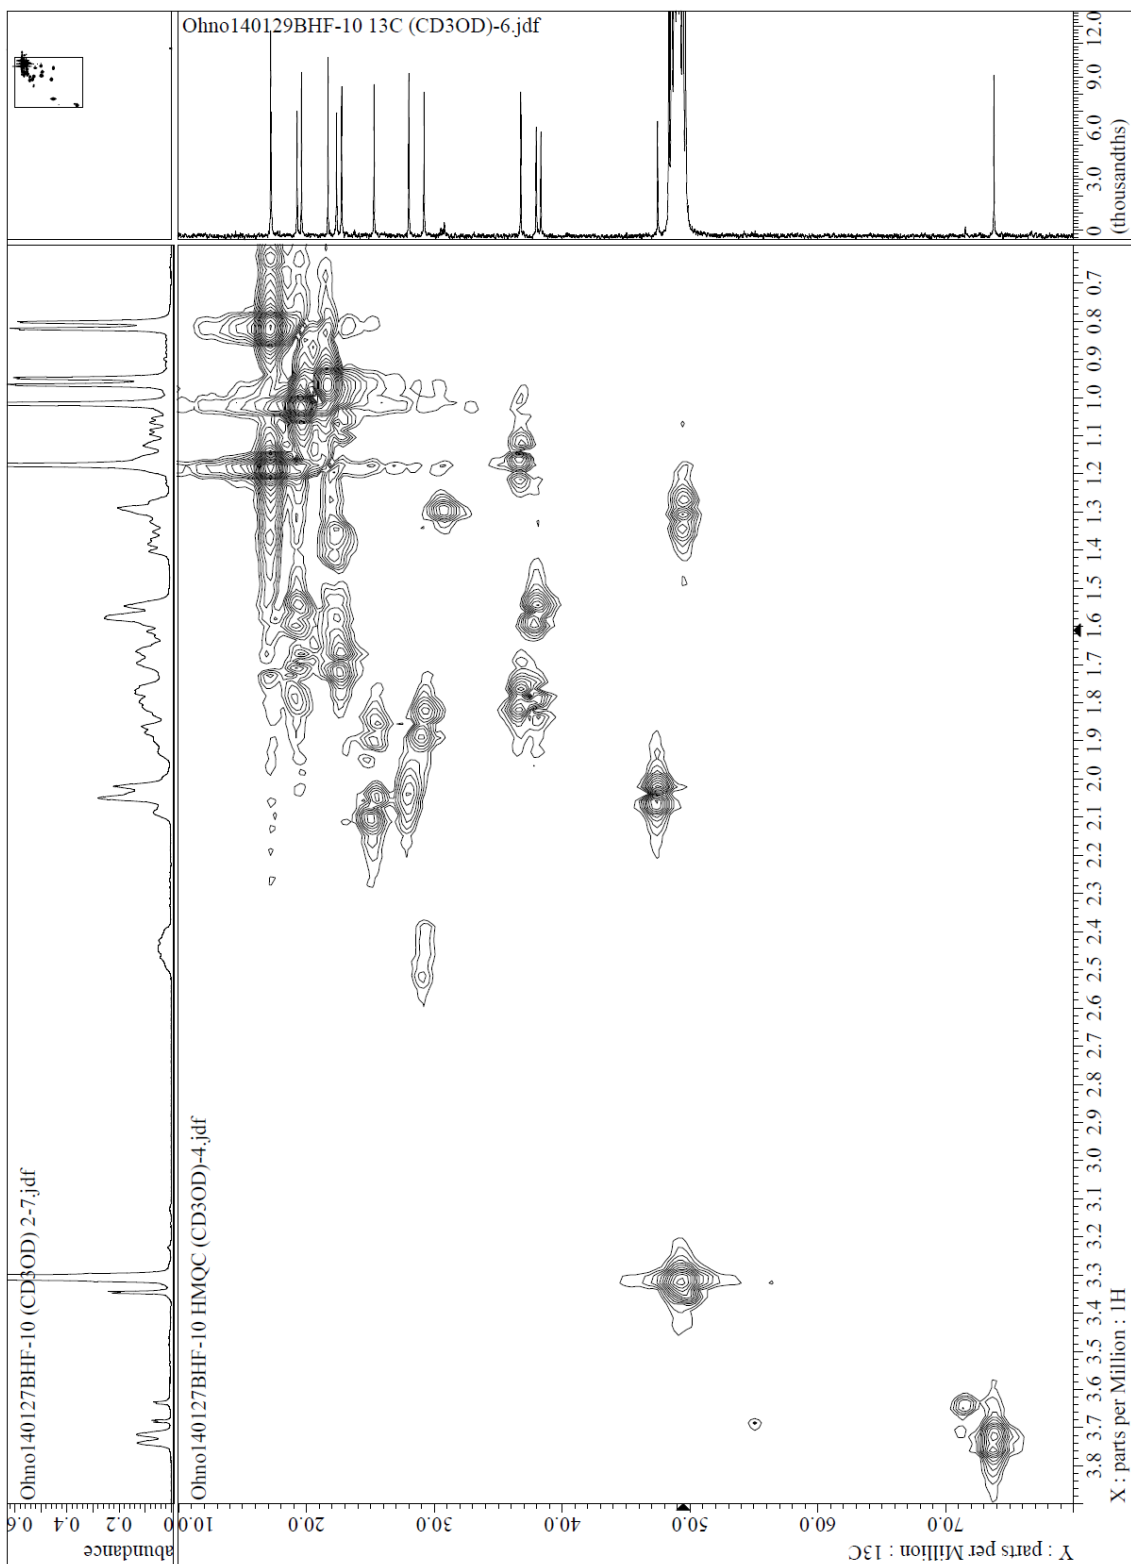

**Figure S5.** HMQC spectrum of suaveolic acid (400 MHz, CD<sub>3</sub>OD)

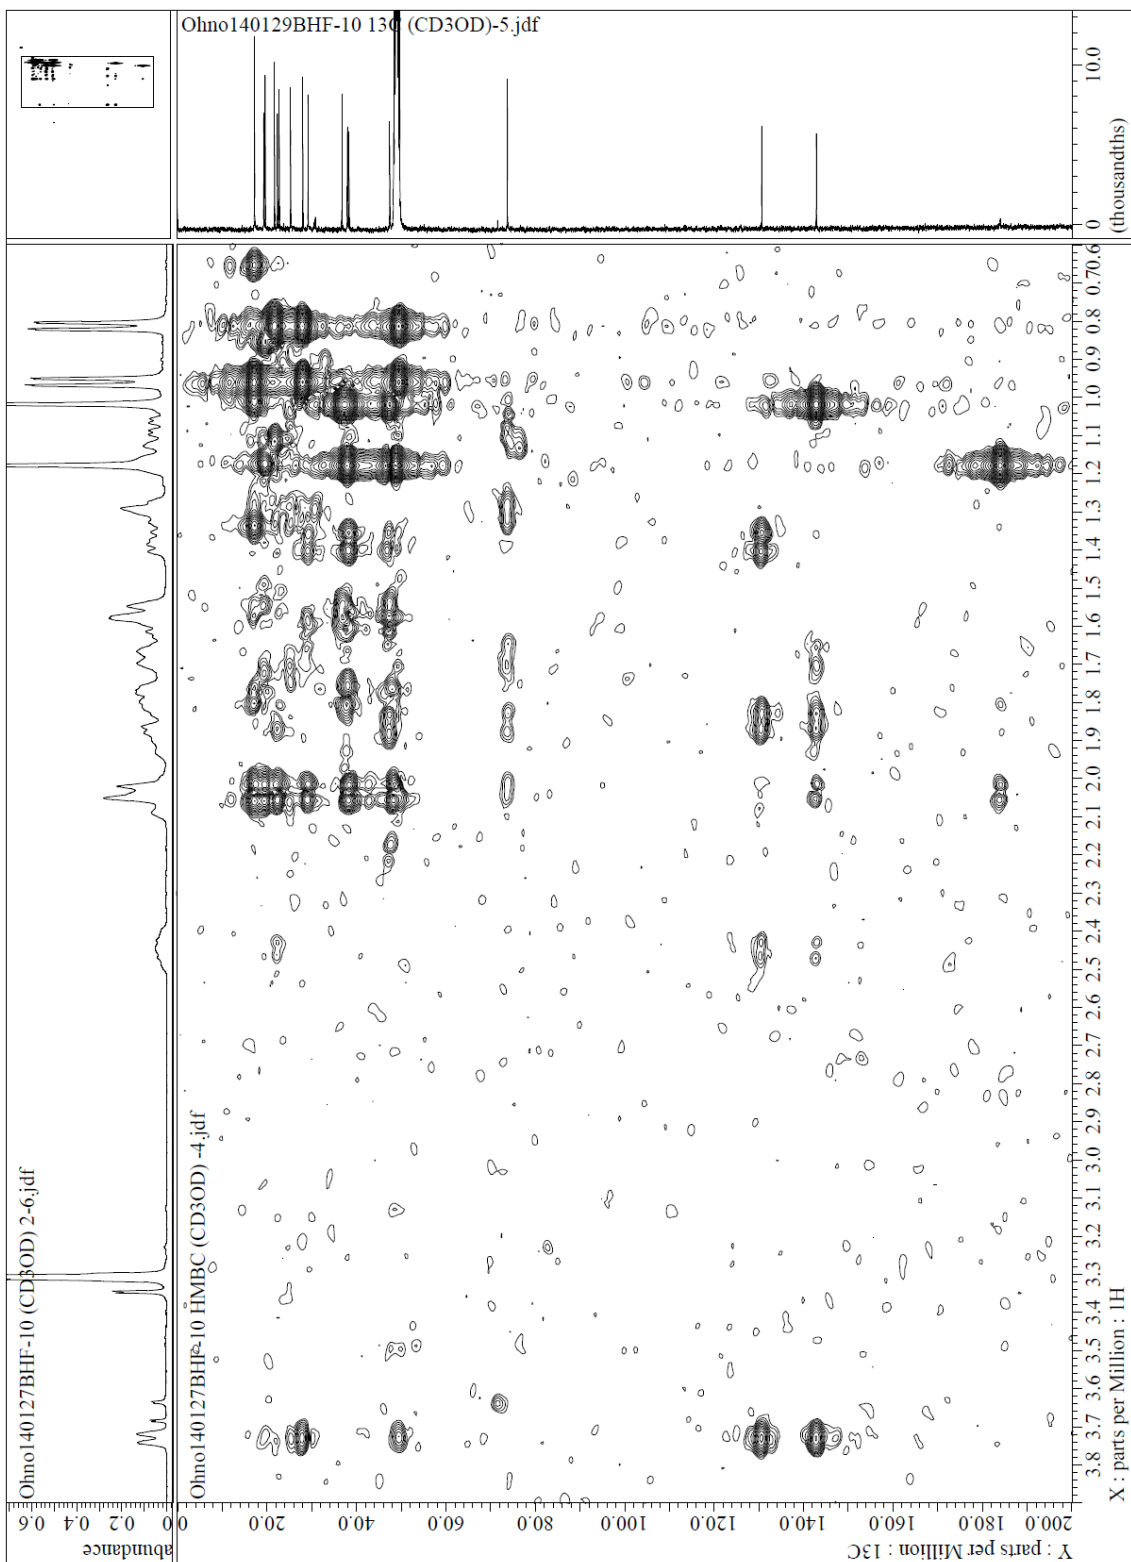

**Figure S6.** HMBC spectrum of suaveolic acid (400 MHz, CD<sub>3</sub>OD)

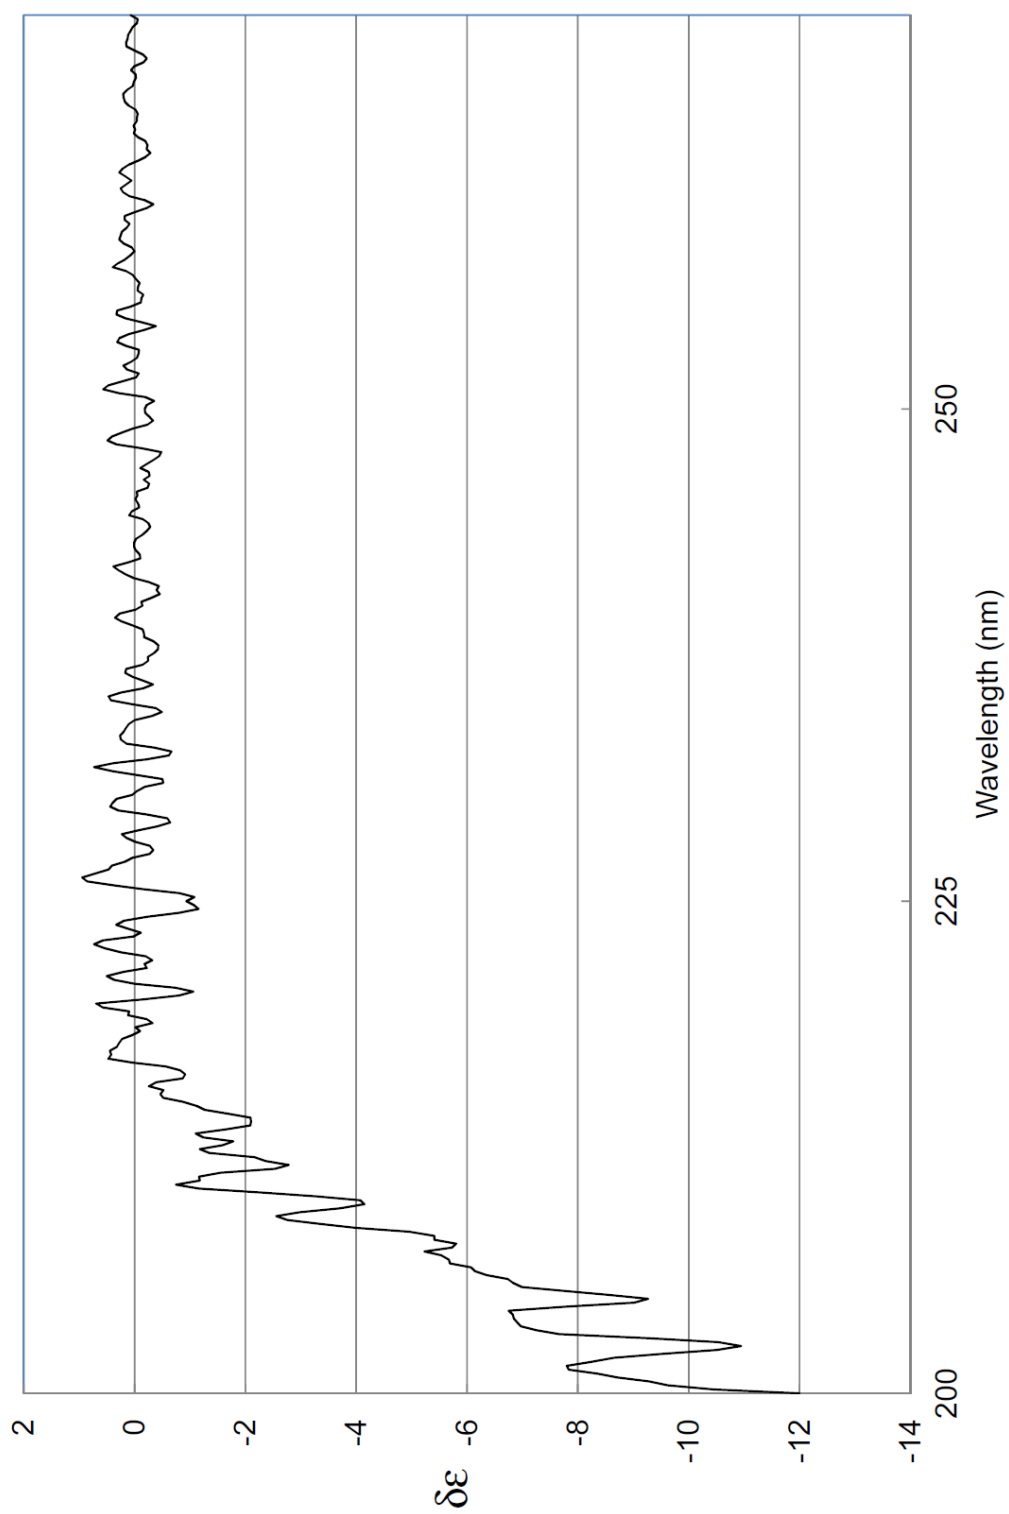

**Figure S7.** CD spectrum of suaveolic acid (MeOH)
